# Supplementary material
Source: PubMed Central journal article supplement (PMC2659392)

**SUPPLEMENTAL DATA**

**Supplemental Figure 1. Whole blood *Sphk* activity in irradiated mice.** 25  $\mu$ l of whole blood was subject to *Sphk* activity with 20  $\mu$ mol/L sphingosine and 10  $\mu$ Ci of  $^{32}$ P-ATP diluted in 500  $\mu$ mol/L ATP for 30 minutes at 37 °C as described <sup>1</sup>. Note Significant increase in *Sphk* activity Day 1 and Day 3 after irradiation was observed while on Day 10 there was reduction in *Sphk* activity. Results are average of 3 mice on duplicate samples.

**Supplemental Figure 2. *Sphk* activity in liver is stimulated upon transduction with Adeno-*Sphk1*.** Adeno-GFP and Adeno-*Sphk1* virus was given I.V. as described in Methods. After 72 hours, liver, kidney, lung and spleen were collected and *Sphk* activity was determined as described <sup>1</sup>. *Sphk* activity for Adeno-GFP and Adeno-*Sphk1* transduced animals was  $14 \pm 4.2$  and  $396 \pm 54.2$  pmol/min/mg in liver,  $37.5 \pm 8.5$  and  $27.1 \pm 4.8$  pmol/min/mg in kidney,  $137.4 \pm 13.1$  and  $185.9 \pm 31.4$  pmol/min/mg in lung, and  $200.7 \pm 35.6$  vs  $327.1 \pm 65.7$  pmol/min/mg in spleen, respectively. Results are average of 3 experiments on duplicate samples.

**Supplemental Figure 3. Sphingosine kinase inhibitor (SKI)-1 blocks formation of S1P and release of S1P in MEEC.** Confluent MEEC cultures were incubated in absence and presence of 50  $\mu$ mol/L SKI-1. Amounts of S1P in the intracellular and extracellular compartments were determined as described in Methods. Results are average of 3 independent analyses.

**Supplemental Figure 4. MAPK is phosphorylated in MEEC upon laminar shear stress.** Confluent MEEC cultures were subject to laminar shear stress. Subsequently immunoblot analysis for MAPK was carried out as described in Methods.

**Supplemental Figure 5. Quantitative RT-PCR analysis of S1P metabolizing enzymes**

**upon shear stress in MEEC.** Transcript levels of *Sphk1*, *Sphk2*, S1P lyase (*Sgpl*), S1P phosphatase 1 and 2 (*Sgpp1* and *Sgpp2*) were determined in static and shear stressed MEEC. Transcripts were normalized to *Gapdh* mRNA. mRNA levels in static control is 100% and mRNA levels in shear stress is presented as % of static control.

## REFERENCE

1. Venkataraman K, Thangada S, Michaud J, Oo ML, Ai Y, Lee YM, Wu M, Parikh N, Khan F, Proia RL, Hla T. Extracellular export of Sphingosine Kinase-1a contributes to the vascular S1P gradient. *Biochem J.* 2006;397:461-71.

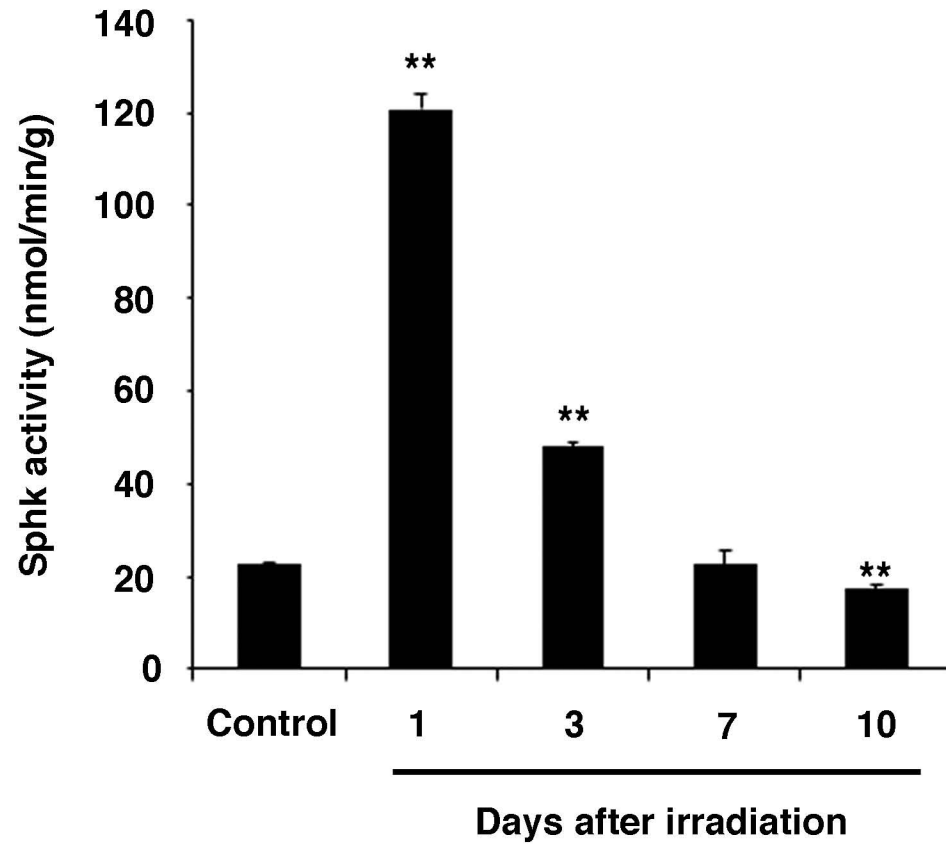

Sup. Fig. 1

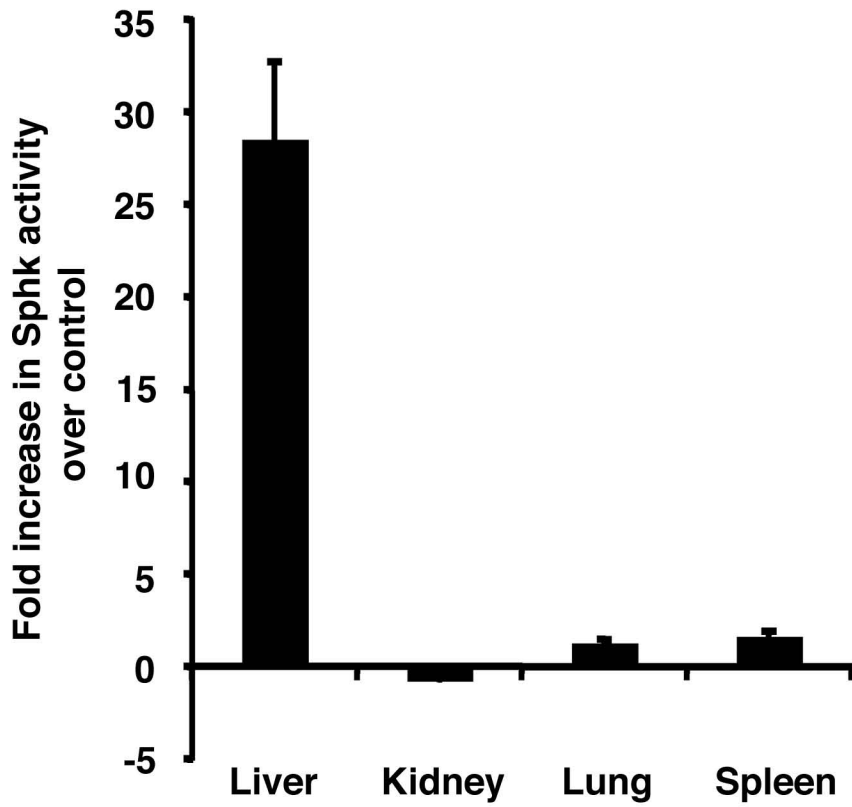

Sup. Fig. 2

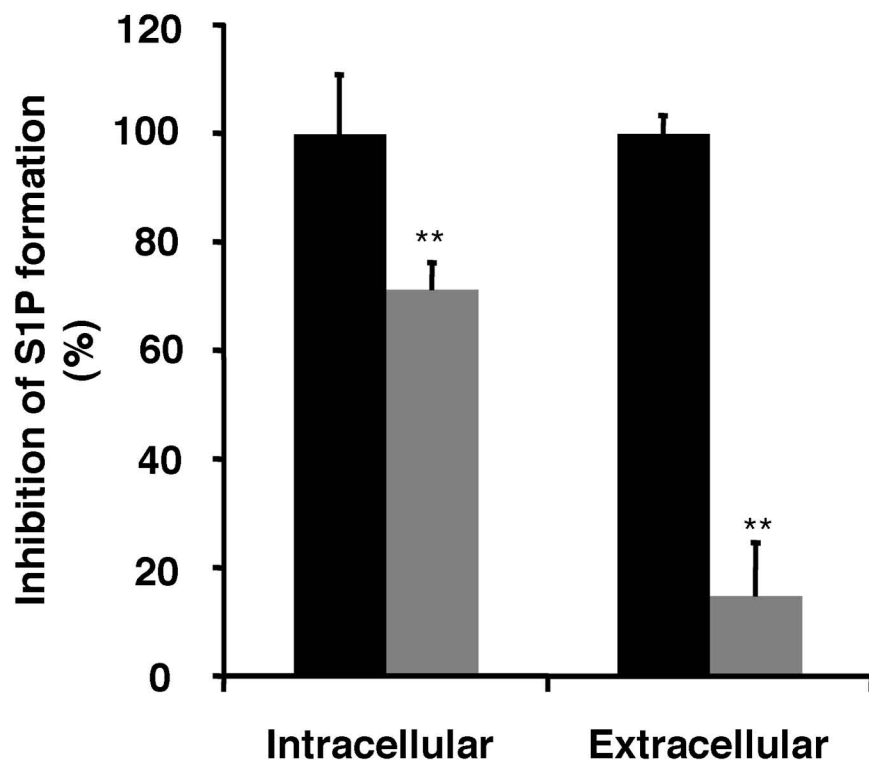

Sup. Fig. 3

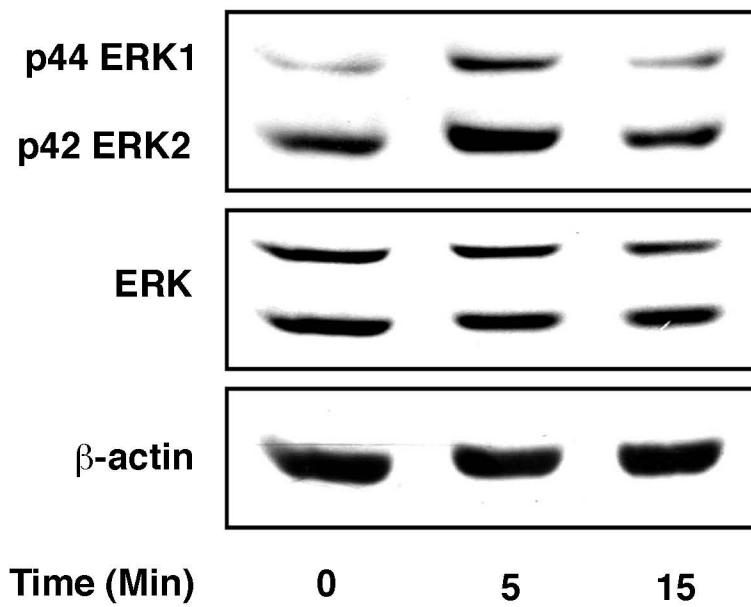

Sup. Fig. 4

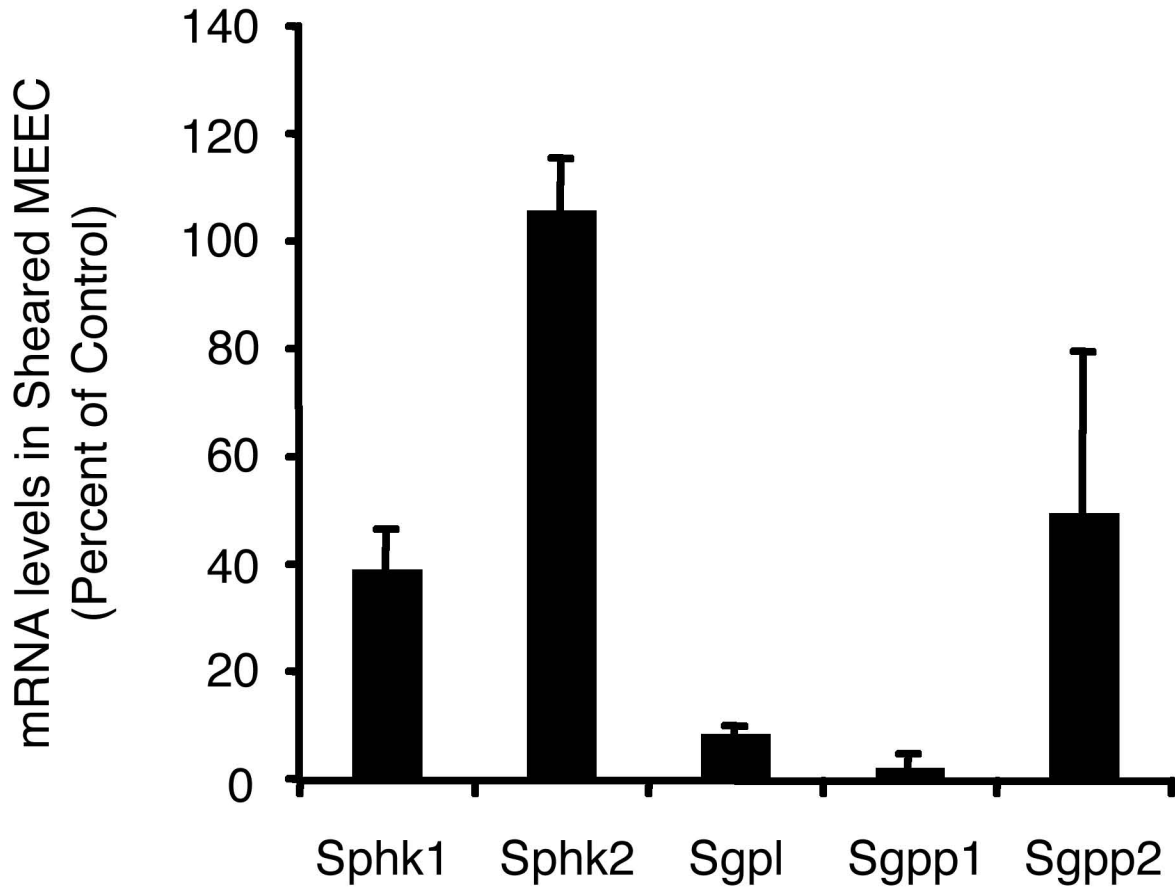

Supplement: NIHMS93339-supplement-supplement.pdf [file NIHMS93339-supplement-supplement.pdf]
